# Supplementary material for: Milk Microbiota of Clinical Mastitic Cows: An Etiological Approach
Source: Preprints.org preprint supplement (doi:10.20944/preprints202304.0997.v1), 2023-04-26
Supplement: Supplementary file 1 [file supplementary]

**MHALI TRANSLATORS**  
**TRADUÇÕES E SERVIÇOS SS LTDA**

Ribeirão Pires, March 7, 2023

To whom it may concern:

We certify that the manuscript entitled **“Milk microbiota of mastitic cows: an etiological approach”**, written by **Simone Lucheis, Anelise Salina, Samea Joaquim, Simony Guerra, Felipe Guimarães, Marcio Ribeiro, Vera Rall, Rodrigo Hernandez, Domingos Leite, Vera Curci and Helio Langoni**, was revised regarding English grammar and syntax by a qualified native English speaker on our staff (born and educated in the United States), who has been working professionally in Brazil as a translator/reviser for over 25 years.



Maria Helena Cardoso da Silva
